# Supplementary material for: Need for Speed: Examining Protein Behavior during CryoEM Grid Preparation at Different Timescales
Source: PubMed Central journal article supplement (PMC7652391; doi:10.1016/j.str.2020.07.018), 2020-11-03
Supplement: mmc1.pdf [file mmc1.pdf]

**Structure, Volume 28**

## **Supplemental Information**

**Need for Speed: Examining Protein**

**Behavior during CryoEM Grid**

**Preparation at Different Timescales**

**David P. Klebl, Molly S.C. Gravett, Dimitrios Kontziampasis, David J. Wright, Robin S. Bon, Diana C.F. Monteiro, Martin Trebbin, Frank Sobott, Howard D. White, Michele C. Darrow, Rebecca F. Thompson, and Stephen P. Muench**

# 1 Supplemental Material

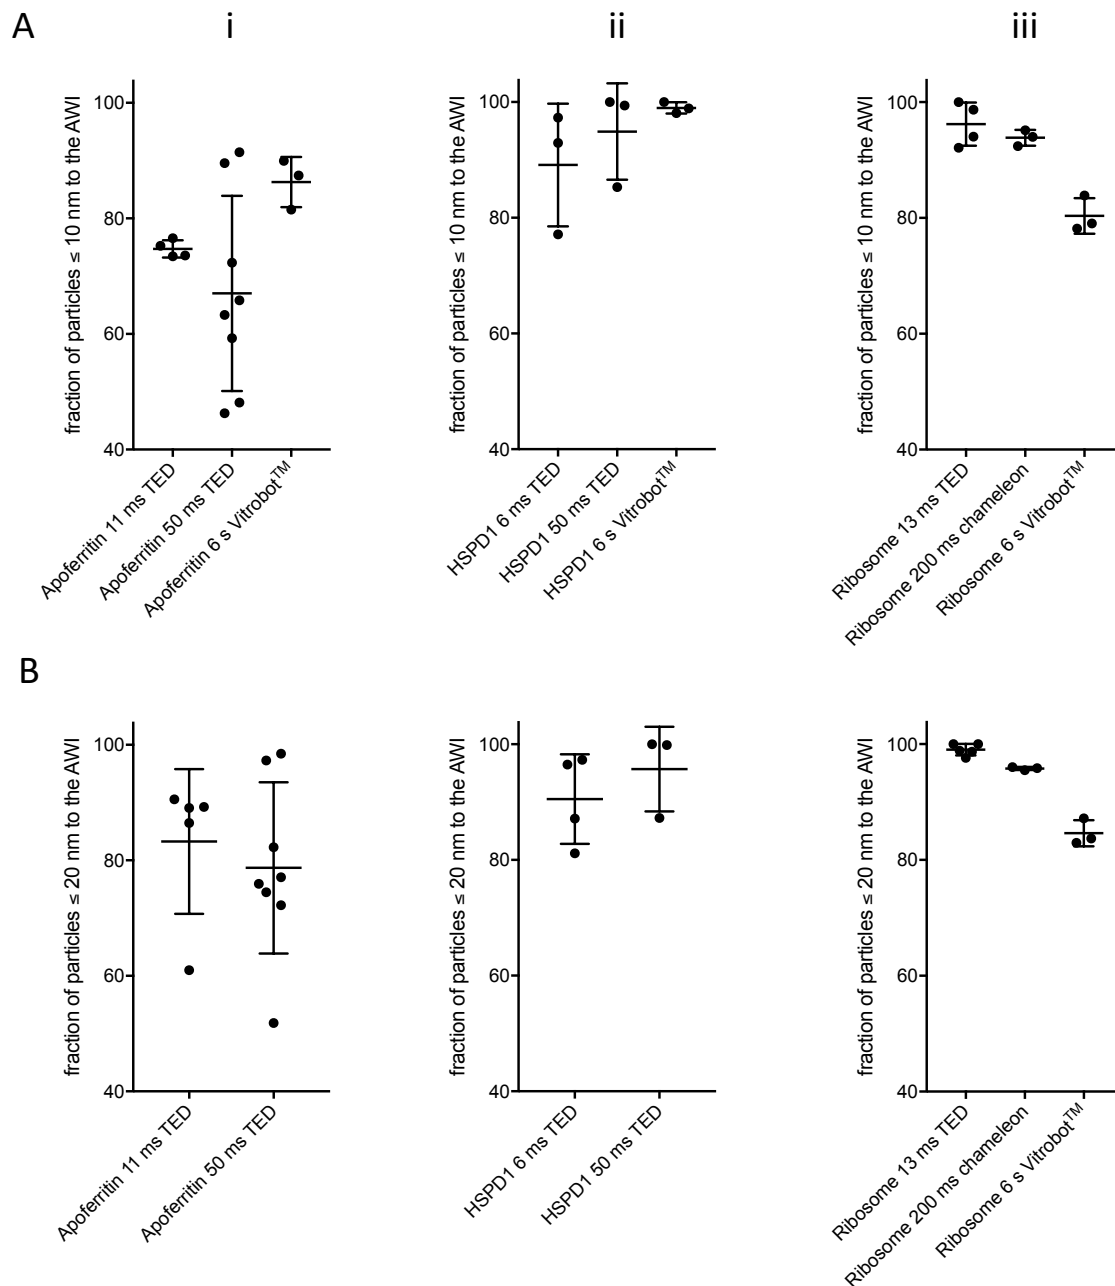

2

3 **Figure S1, related to Figure 2. Partitioning of particles to the AWI.** Fraction of particles  
4 partitioning to the AWI within 10 nm (A) or 20 nm (B) for apoferritin (i), HSPD1 (ii) and  
5 ribosomes (iii), with time and method of vitrification indicated. Some Vitrobot™ values were  
6 excluded from (B) because of low ice thickness. Shown are the individual data points, mean  
7 value and standard deviation.

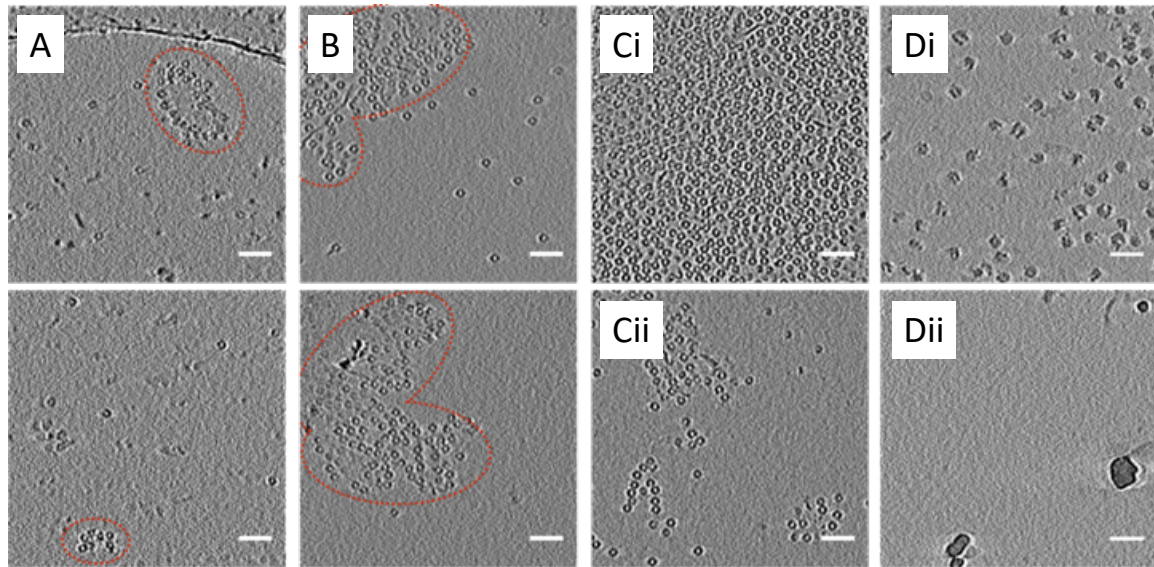

8

9 **Figure S2, related to Figure 2. Surface aggregates at varying timepoints.** Sections  
 10 through reconstructed tomograms from TED grids, showing morphology of apoferritin  
 11 aggregates at the AWI at (A) 11 ms or (B) 50 ms, outlined in red. Some tomograms showed  
 12 highly asymmetric distributions of particles, with two interfaces from the same tomogram  
 13 shown in (Ci) and (Cii) or (Di) and (Dii) for the apoferritin 50 ms and ribosome 13 ms sample,  
 14 respectively. Scale bars 50 nm.

15

16

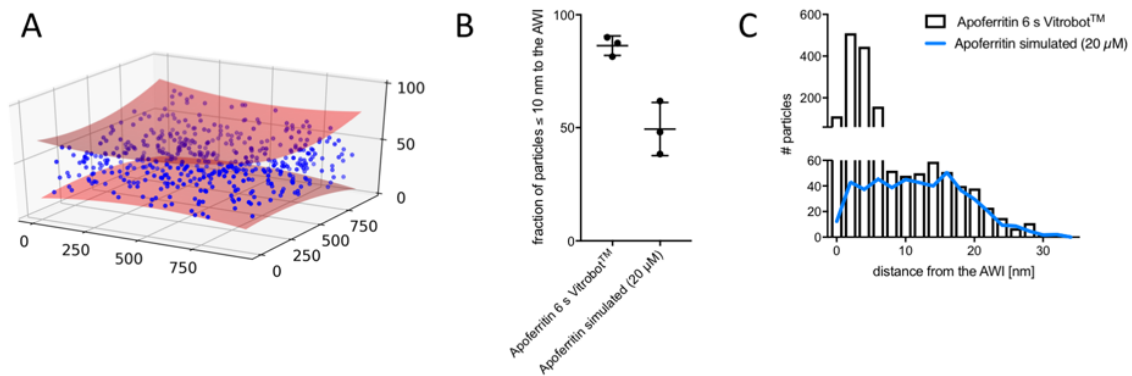

17

18 **Figure S3, related to Figure 3. Comparing modelled data to experimental apoferritin**  
 19 **partitioning.** (A) Modelled distribution of particles (blue) in an ice layer (red), with coordinates  
 20 indicated on axis (nm). AWIs were taken from an experimental tomogram and particle  
 21 coordinates were randomly generated. This models a situation with no changes in  
 22 concentration compared with sample applied, and no affinity for the AWI. (B) Comparison  
 23 between modeled and experimental data for particle partitioning to the AWI. Particle  
 24 concentration is 20  $\mu\text{M}$ ,  $P = 0.007$ . (C) Distributions of distances between particles and AWI  
 25 for simulated (blue line) and experimental data (black bars) for apoferritin Vitrobot™ grids.

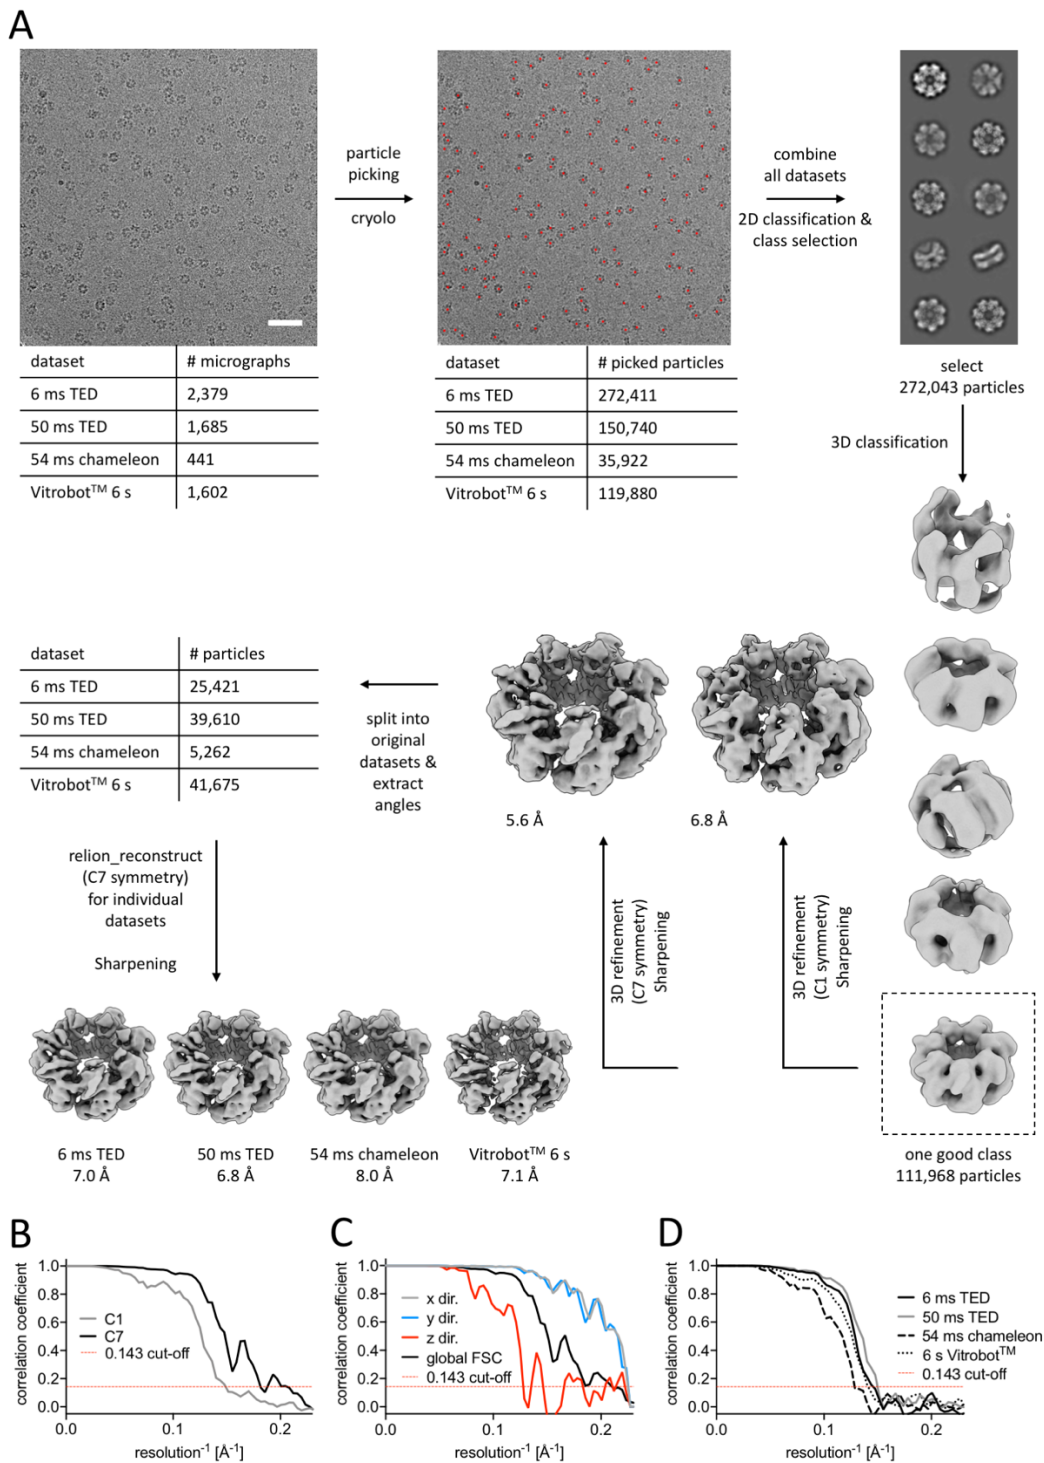

26

27 **Figure S4, related to Figure 4. CryoEM image processing of HSPD1 data to yield angular**  
 28 **distribution data and FSC curves for HSPD1 consensus structures.** A Data processing  
 29 pipelines for HSPD1 data showing particle numbers and corresponding 3D density maps and  
 30 resolution for each sample preparation device and timescale analysed. Datasets have varying  
 31 ice thicknesses, particle number and angular orientation and so resolutions cannot be directly  
 32 compared. (B) FSC curves for masked maps of the consensus structure (all datasets  
 33 combined) with and without symmetry. (C) 3D-FSC analysis of the same reconstruction,  
 34 showing that resolution in the z-direction is limited through the lack of side views. Note that  
 35 pixel size is 2.13 Å. (D) FSC curves for reconstructions for each individual dataset.

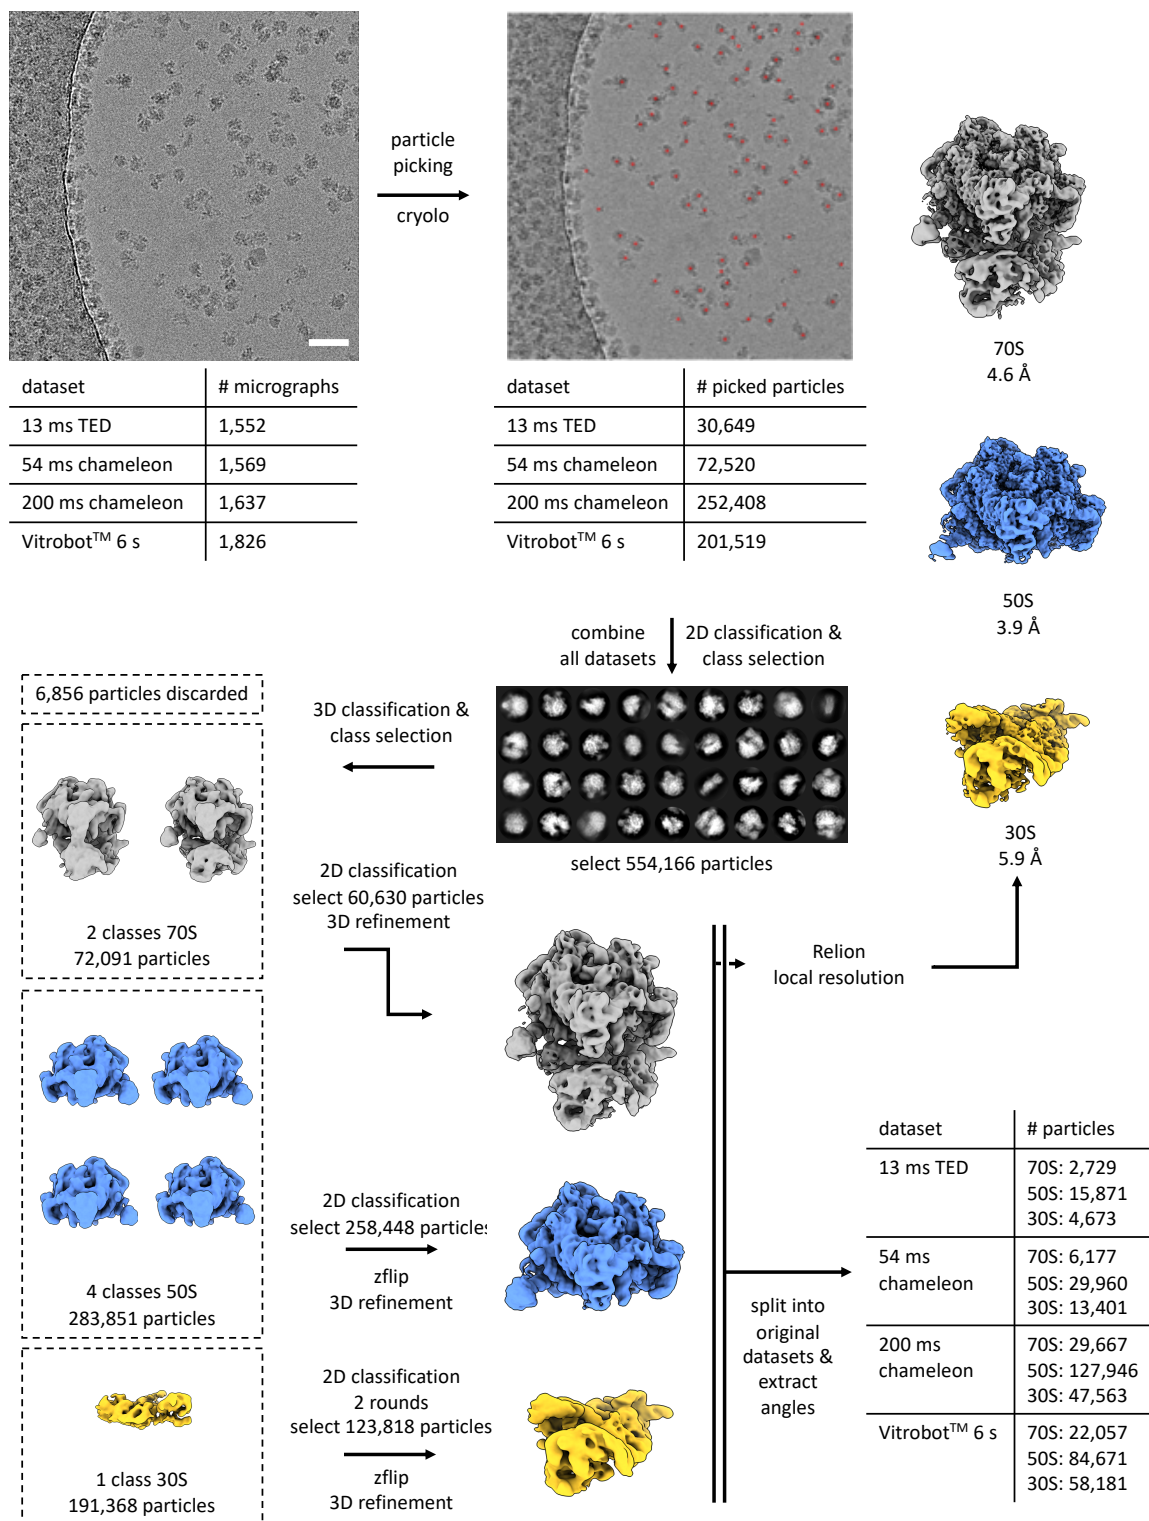

36

37 **Figure S5, related to Figure 5. CryoEM image processing of ribosome data to yield**  
 38 **angular distribution data.** Data processing pipelines for ribosome angular orientation maps.  
 39 Micrographs shown are representative of the type of micrograph used.

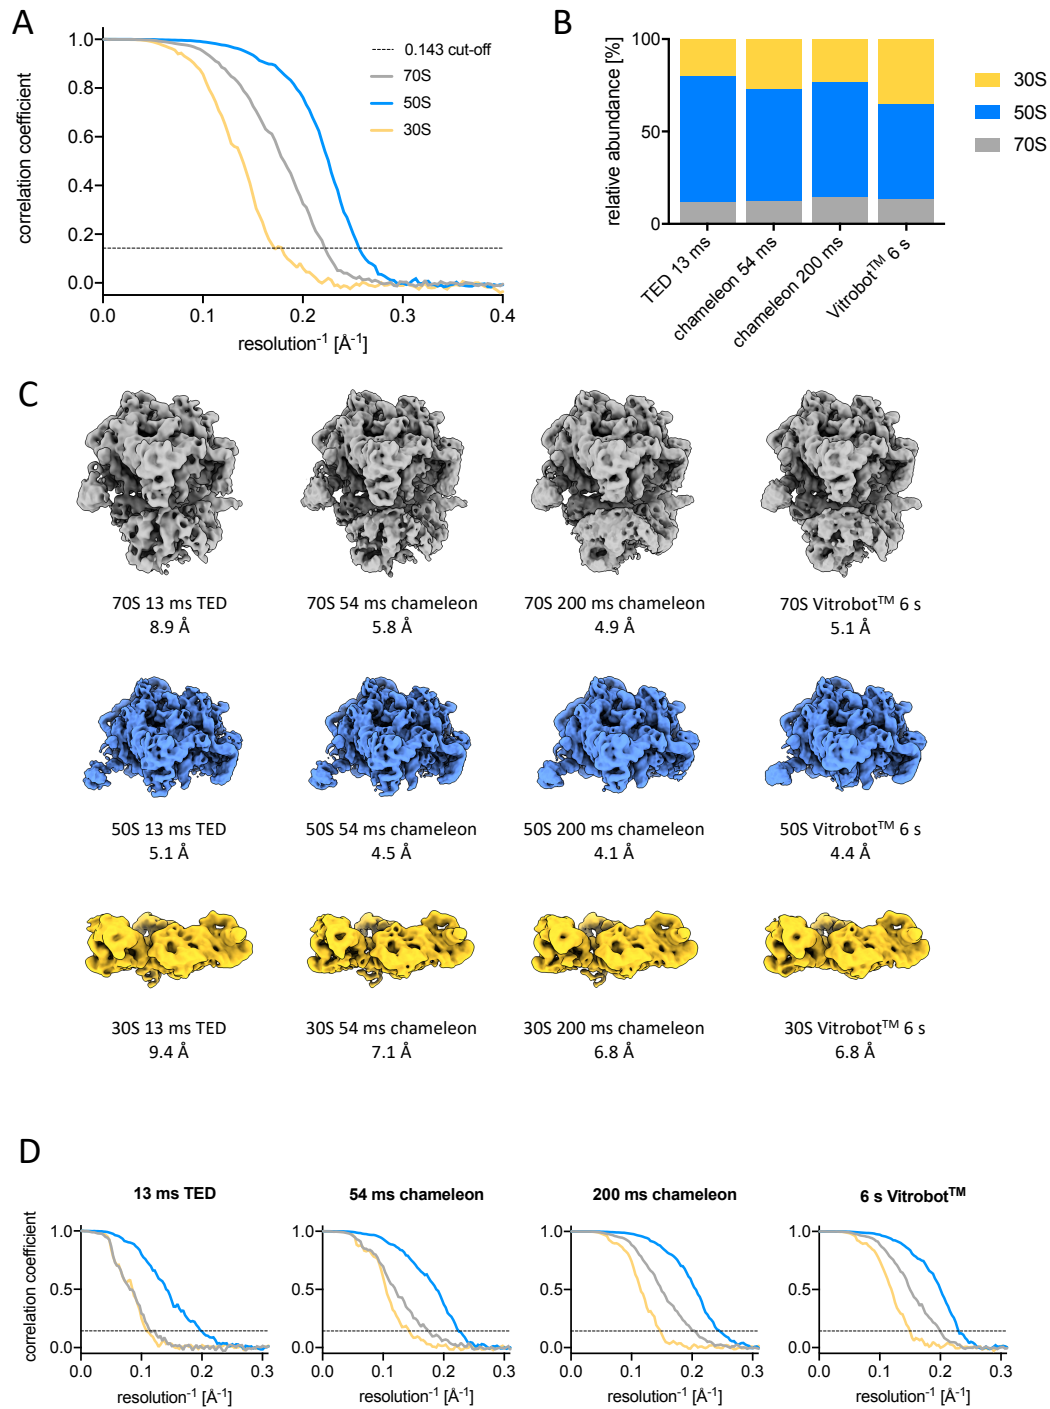

40

41 **Figure S6, related to Figure 5. CryoEM reconstructions of ribosome data at different**  
 42 **time points and vitrification devices.** (A) FSC curves for masked, consensus  
 43 reconstructions of 70S, 50S and 30S ribosome. (B) Relative particle numbers for 30S, 50S  
 44 and 70S by individual dataset. (C) Individual reconstructed maps for 70S, 50S and 30S for all  
 45 4 subsets and corresponding FSC curves (D).

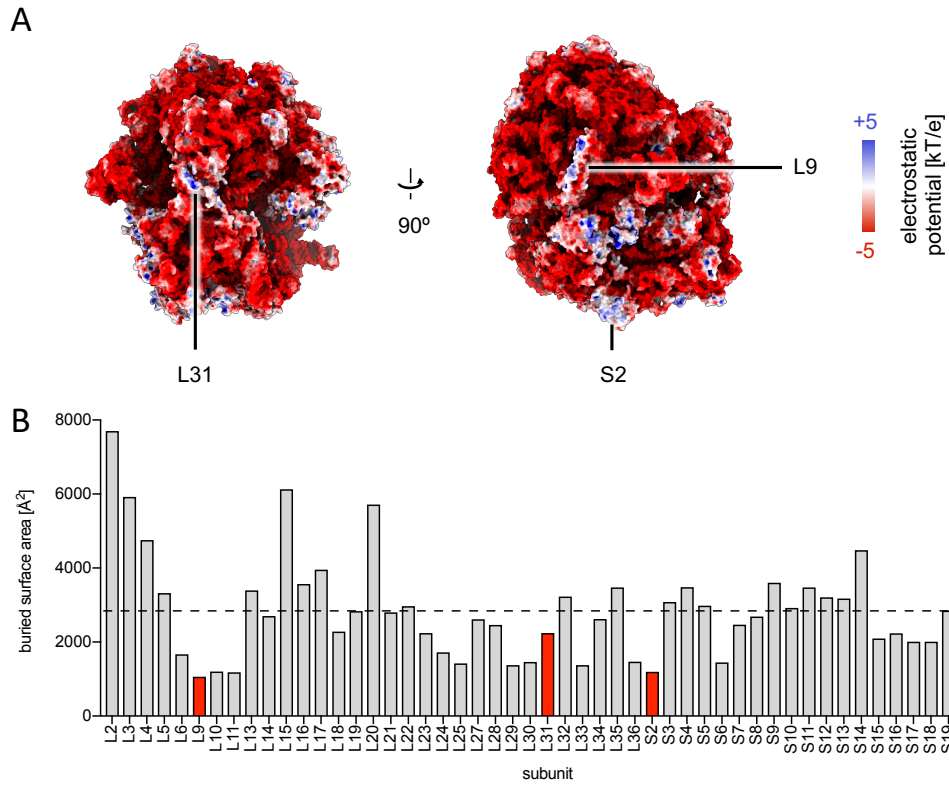

46

47 **Figure S7, related to Figure 6. Analysis of the surface properties and buried surface**  
 48 **area for the ribosomal proteins L9, L31 and S2. (A) Electrostatic surface potential of the**  
 49 **ribosome with subunits L9, L31 and S2 highlighted showing their contrasting neutral/positive**  
 50 **charge compared to the predominantly negative charge of the ribosome. (B) Buried surface**  
 51 **area for the different ribosomal proteins with the average buried surface area indicated by a**  
 52 **dashed line.**

53

|               | Time and vitrification device | Repeat    | Concentration [ $\mu\text{M}$ ] | Applied concentration [ $\mu\text{M}$ ] | Ice thickness [nm] | # particles | relative particle # ( $\leq 10\text{nm}$ ) | relative particle # ( $\leq 20\text{nm}$ ) |     |
|---------------|-------------------------------|-----------|---------------------------------|-----------------------------------------|--------------------|-------------|--------------------------------------------|--------------------------------------------|-----|
| Apoferitin    | 11 ms TED                     | 1         | 1.0                             | 20.0                                    | 168                | 100         | 21*                                        | 61                                         |     |
|               |                               | 2         | 1.9                             |                                         | 96                 | 111         | 77                                         | 86                                         |     |
|               |                               | 3         | 1.4                             |                                         | 78                 | 64          | 73                                         | 89                                         |     |
|               |                               | 4         | 0.9                             |                                         | 97                 | 53          | 74                                         | 91                                         |     |
|               |                               | 5         | 2.2                             |                                         | 139                | 186         | 75                                         | 89                                         |     |
|               | 50 ms TED                     | 1         | 3.4                             | 20.0                                    | 152                | 253         | 72                                         | 77                                         |     |
|               |                               | 2         | 7.7                             |                                         | 135                | 509         | 66                                         | 74                                         |     |
|               |                               | 3         | 2.1                             |                                         | 68                 | 54          | 48                                         | 72                                         |     |
|               |                               | 4         | 1.7                             |                                         | 76                 | 79          | 63                                         | 82                                         |     |
|               |                               | 5         | 1.4                             |                                         | 64                 | 54          | 59                                         | 76                                         |     |
|               |                               | 6         | 119.2                           |                                         | 47                 | 2160        | 90                                         | 98                                         |     |
|               |                               | 7         | 41.8                            |                                         | 90                 | 1835        | 91                                         | 97                                         |     |
|               |                               | 8         | 1.3                             |                                         | 88                 | 54          | 46                                         | 52                                         |     |
|               | 6 s Vitrobot™                 | 1         | 53.9                            | 20.0                                    | 54                 | 1751        | 90                                         | 97**                                       |     |
|               |                               | 2         | 69.1                            |                                         | 43                 | 1622        | 82                                         | 96**                                       |     |
|               |                               | 3         | 83.8                            |                                         | 34                 | 1582        | 87                                         | 99**                                       |     |
|               | HSPD1                         | 6 ms TED  | 1                               | 1.5                                     | 11.0               | 95          | 70                                         | 77                                         | 87  |
|               |                               |           | 2                               | 1.2                                     |                    | 73          | 69                                         | 46*                                        | 81  |
| 3             |                               |           | 0.9                             | 82                                      |                    | 37          | 97                                         | 97                                         |     |
| 4             |                               |           | 2.3                             | 62                                      |                    | 85          | 93                                         | 96                                         |     |
| 50 ms TED     |                               | 1         | 18.8                            | 11.0                                    | 60                 | 680         | 99                                         | 100                                        |     |
|               |                               | 2         | 4.9                             |                                         | 87                 | 204         | 85                                         | 87                                         |     |
|               |                               | 3         | 7.4                             |                                         | 73                 | 325         | 100                                        | 100                                        |     |
| 6 s Vitrobot™ |                               | 1         | 18.9                            | 0.6                                     | 39                 | 193         | 100                                        | 100**                                      |     |
|               |                               | 2         | 10.0                            |                                         | 50                 | 270         | 99                                         | 100**                                      |     |
|               |                               | 3         | 9.3                             |                                         | 64                 | 156         | 98                                         | 100**                                      |     |
| Ribosome      |                               | 13 ms TED | 1                               | 1.3                                     | 2.5                | 113         | 57                                         | 19*                                        | 100 |
|               |                               |           | 2                               | 0.3                                     |                    | 130         | 14                                         | 100                                        | 100 |
|               | 3                             |           | 3.2                             | 151                                     |                    | 84          | 94                                         | 98                                         |     |
|               | 4                             |           | 3.9                             | 119                                     |                    | 178         | 92                                         | 99                                         |     |
|               | 5                             |           | 5.9                             | 67                                      |                    | 152         | 99                                         | 99                                         |     |
|               | 200 ms chameleon              | 1         | 11.9                            | 2.5                                     | 136                | 864         | 95                                         | 96                                         |     |
|               |                               | 2         | 12.5                            |                                         | 137                | 934         | 94                                         | 96                                         |     |
|               |                               | 3         | 15.8                            |                                         | 135                | 1235        | 92                                         | 96                                         |     |
|               | 6 s Vitrobot™                 | 1         | 17.0                            | 0.8                                     | 92                 | 601         | 79                                         | 84                                         |     |
|               |                               | 2         | 23.5                            |                                         | 93                 | 843         | 84                                         | 87                                         |     |
|               |                               | 3         | 20.2                            |                                         | 97                 | 787         | 78                                         | 83                                         |     |

54

55 **Table S1, related to Figure 2. Summary table of tomograms analysed to produce**  
56 **partitioning and particle concentration data.** “Concentration” is the estimated concentration  
57 from the tomogram, “Applied concentration” is the concentration of the sample applied.  
58 “Relative particle #” is the percentage of particles within  $\leq 10$  or  $20$  nm of the AWI.

59 \* Values were excluded from analysis because of poor fitting of AWIs.

60 \*\* Values were excluded from analysis because of low ice thickness.

61

62

63

64

65

66



67

|                                                |                 |
|------------------------------------------------|-----------------|
| Microscope                                     | Titan Krios II  |
| Magnification                                  | 42,000          |
| Voltage (kV)                                   | 300             |
| Electron dose per image ( $e^-/\text{\AA}^2$ ) | 1.8 - 1.9       |
| Fractions per image                            | 3               |
| maximum/minimum tilt (increment)               | -60°, +60° (2°) |
| Tilt scheme                                    | bidirectional   |
| Defocus range ( $\mu\text{m}$ )                | -5 to -10       |
| Pixel size ( $\text{\AA}$ )                    | 3.4             |

68

69 **Table S2, related to Figure 3. Microscope parameters for collection of cryo-ET data.**

|                                            | <b>HSPD1</b>    |                  |                        |                      |
|--------------------------------------------|-----------------|------------------|------------------------|----------------------|
|                                            | <b>6 ms TED</b> | <b>50 ms TED</b> | <b>54 ms chameleon</b> | <b>6 s Vitrobot™</b> |
| Microscope                                 | Titan Krios I   |                  |                        |                      |
| Magnification                              | 75,000          |                  |                        |                      |
| Voltage (kV)                               | 300             |                  |                        |                      |
| Total electron dose ( $e^-/\text{\AA}^2$ ) | 81              | 81               | 74                     | 75                   |
| Exposure time                              | 1.5             | 1.5              | 1.5                    | 1.5                  |
| Number of frames                           | 59              | 59               | 59                     | 59                   |
| Defocus range ( $\mu\text{m}$ )            | -2 to -4        | -2 to -4.5       | -1.5 to -3.5           | -1.3 to -3.3         |
| Pixel size ( $\text{\AA}$ )                | 1.065           |                  |                        |                      |

70 **Table S3, related to STAR Methods. Data collection parameters for SPA datasets of**  
71 **HSPD1.**

|                                            | <b>ribosome</b>  |                        |                         |                      |
|--------------------------------------------|------------------|------------------------|-------------------------|----------------------|
|                                            | <b>13 ms TED</b> | <b>54 ms chameleon</b> | <b>200 ms chameleon</b> | <b>6 s Vitrobot™</b> |
| Microscope                                 | Titan Krios I    |                        |                         |                      |
| Magnification                              | 75,000           |                        |                         |                      |
| Voltage (kV)                               | 300              |                        |                         |                      |
| Total electron dose ( $e^-/\text{\AA}^2$ ) | 77               | 74                     | 74                      | 78                   |
| Exposure time                              | 1.5              | 1.6                    | 1.5                     | 1.5                  |
| Number of frames                           | 59               | 59                     | 59                      | 59                   |
| Defocus range ( $\mu\text{m}$ )            | -1.3 to -3.3     | -1.3 to -3.3           | -1.3 to -3.3            | -1.3 to -3.3         |
| Pixel size ( $\text{\AA}$ )                | 1.065            |                        |                         |                      |

72 **Table S4, related to STAR Methods. Data collection parameters for SPA datasets of the**73 **ribosome.**
